# Supplementary material for: A pH-sensitive supramolecular nanosystem with chlorin e6 and triptolide co-delivery for chemo-photodynamic combination therapy
Source: PubMed Central journal article supplement — Asian J Pharm Sci. 2022 Jan 16;17(2):206–18. doi: 10.1016/j.ajps.2021.12.003 (PMC9091603; doi:10.1016/j.ajps.2021.12.003), 2022-01-16
Supplement: mmc2.pdf [file mmc2.pdf]

# Certificate of English Language Editing

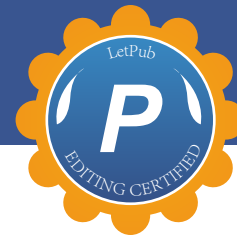

## Manuscript Title:

A pH-sensitive supramolecular nanosystem with chlorin e6 and triptolide co-delivery for chemo-photodynamic combination therapy

## Date of Revision:

November 17, 2021

### Abstract:

The combination of chlorin e6 (Ce6), an acknowledged photosensitizer, and triptolide (TPL), a natural anticancer agent, has been demonstrated as a useful strategy to reinforce the tumor growth suppression and decrease the systemic side effects compared with their monotherapy. However, in view of the optimal chemo-photodynamic combination efficiency, feasible nanovehicle to steadily co-deliver Ce6 and TPL is still missing, whereas stimuli-responsively burst release drugs in tumor site. Herein, we described the synergistic antitumor performance of a pH-sensitive supramolecular nanosystem, mediated by the host-guest complexing between  $\beta$ -cyclodextrin ( $\beta$ -CD) and acid pH-responsive amphiphilic co-polymer methoxy poly (ethylene glycol)-poly (beta-amino ester)-methoxy poly (ethylene glycol) (mPEG-PBAE-mPEG), showing the shell-core structural micelles with the tight  $\beta$ -CD layer coating. Both Ce6 and TPL were facilely co-loaded into the spherical supramolecular NPs (TPL+Ce6/NPs) by one-step nanoprecipitation method, with an ideal particle size (156.0 nm), acid pH-responsive drug release profile, and enhanced cellular internalization capacity...

This document certifies that the manuscript listed above was copy edited for English language by LetPub, with regard to grammar, punctuation, spelling, and clarity. All of our language editors are native English speakers with long-term experience in editing scientific and technical manuscripts. We are committed to leveling the playing field for researchers whose native language is not English.

- Documents receiving this certification should be regarded as having undergone professional editorial revision for English language before submission. However, the authors may accept or reject LetPub's suggestions and changes at their own discretion and LetPub does not have editorial control over the submitted documents.
- The language quality of the submitted document is the sole responsibility of the submitting authors subject to those authors' adherence to LetPub's revisions and instruction. LetPub's provision of service does not constitute a guarantee or endorsement of the authors' work herein.
- Neither the research content nor the authors' intended meaning were altered in any way during the editing process.
- If you have any questions or concerns about this edited document, please contact us at [support@letpub.com](mailto:support@letpub.com)

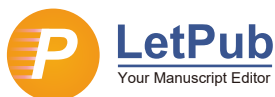

LetPub is an author service brand owned and operated by Accdon LLC. Headquartered in the Boston area, we are a full-spectrum author services company with a large team of US-based certified language and scientific editors, ISO 17001 accredited translators, and professional scientific illustrators and animators. We advocate ethical publication practices and are an official member of the Committee on Publication Ethics (COPE).

For more information about our company, services, and partnership programs, please visit [www.letpub.com](http://www.letpub.com).

© 2021 Accdon, LLC. All Rights Reserved. Tel: 1-781-202-9968 Email: [info@accdon.com](mailto:info@accdon.com) Address: 400 Fifth Ave, Suite 530, Waltham, MA 02451, United States
